# Supplementary material
Source: MDPI journal article supplement (https://www.mdpi.com/1424-2818/11/6/98)
Supplement: s1 [file s1]

# The Composition and Assembly of Bacterial Communities across the Rhizosphere and Phyllosphere Compartments of *Phragmites Australis*

Qi Zhou <sup>1</sup>, Xiaomin Zhang <sup>1</sup>, Rujia He <sup>1,2</sup>, Shuren Wang <sup>1,2</sup>, Congcong Jiao <sup>1,2</sup>, Rui Huang <sup>1,2</sup>, Xiaowei He <sup>1</sup>, Jin Zeng <sup>2</sup> and Dayong Zhao <sup>1,\*</sup>

<sup>1</sup> State Key Laboratory of Hydrology-Water Resources and Hydraulic Engineering, Joint International Research Laboratory of Global Change and Water Cycle, College of Hydrology and Water Resources, Hohai University, Nanjing 210098, China; zhouqqi\_hhu@163.com (Q.Z.); zhangxiaomin679@163.com (X.Z.); herujia1994@163.com (R.H.) (Rujia He); 15195873750@163.com (S.W.); congccjiao\_hhu@163.com (C.J.); huangrui\_sheng@sina.com (R.H.) (Rui Huang); Daisy\_hxw@outlook.com (X.H.);

<sup>2</sup> State Key Laboratory of Lake Science and Environment, Nanjing Institute of Geography and Limnology, Chinese Academy of Sciences, Nanjing, 210008, China; jzeng@niglas.ac.cn

\* Correspondence: dyzhao@hhu.edu.cn; Tel.: +86-2583787891

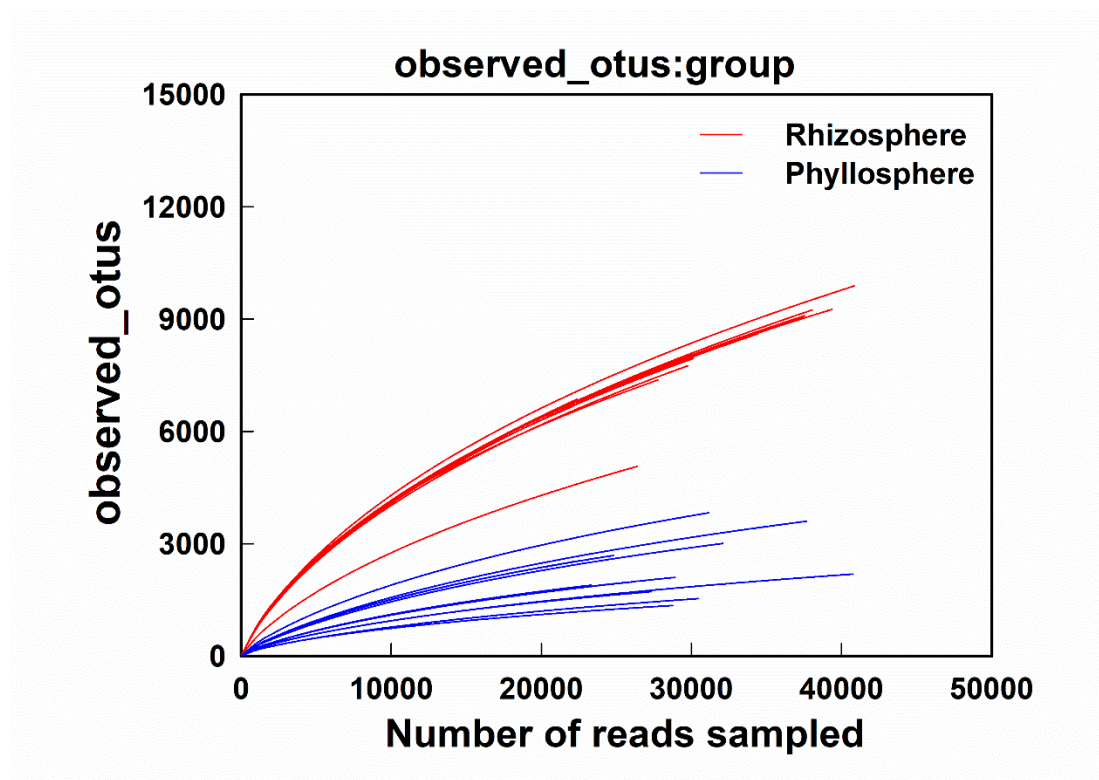

**Figure S1.** Rarefaction curves of observed OTUs in rhizosphere and phyllosphere compartments of *Phragmites australis*. Curves were determined by average numbers of OTU at the gradient of per 1000

reads. The operational taxonomic unit (OTUs) were defined at 3% dissimilarity.

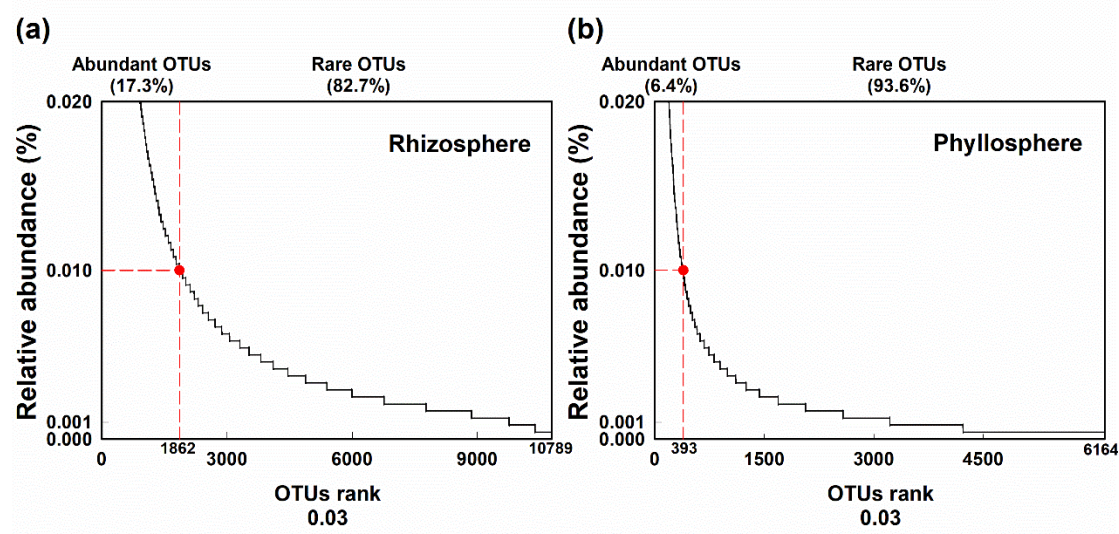

**Figure S2.** Rank abundance curve for the obtained OTUs. (a) Abundant OTUs and rare OTUs in rhizosphere; (b) Abundant OTUs and rare OTUs in phyllosphere. The OTUs were defined at 3% dissimilarity.

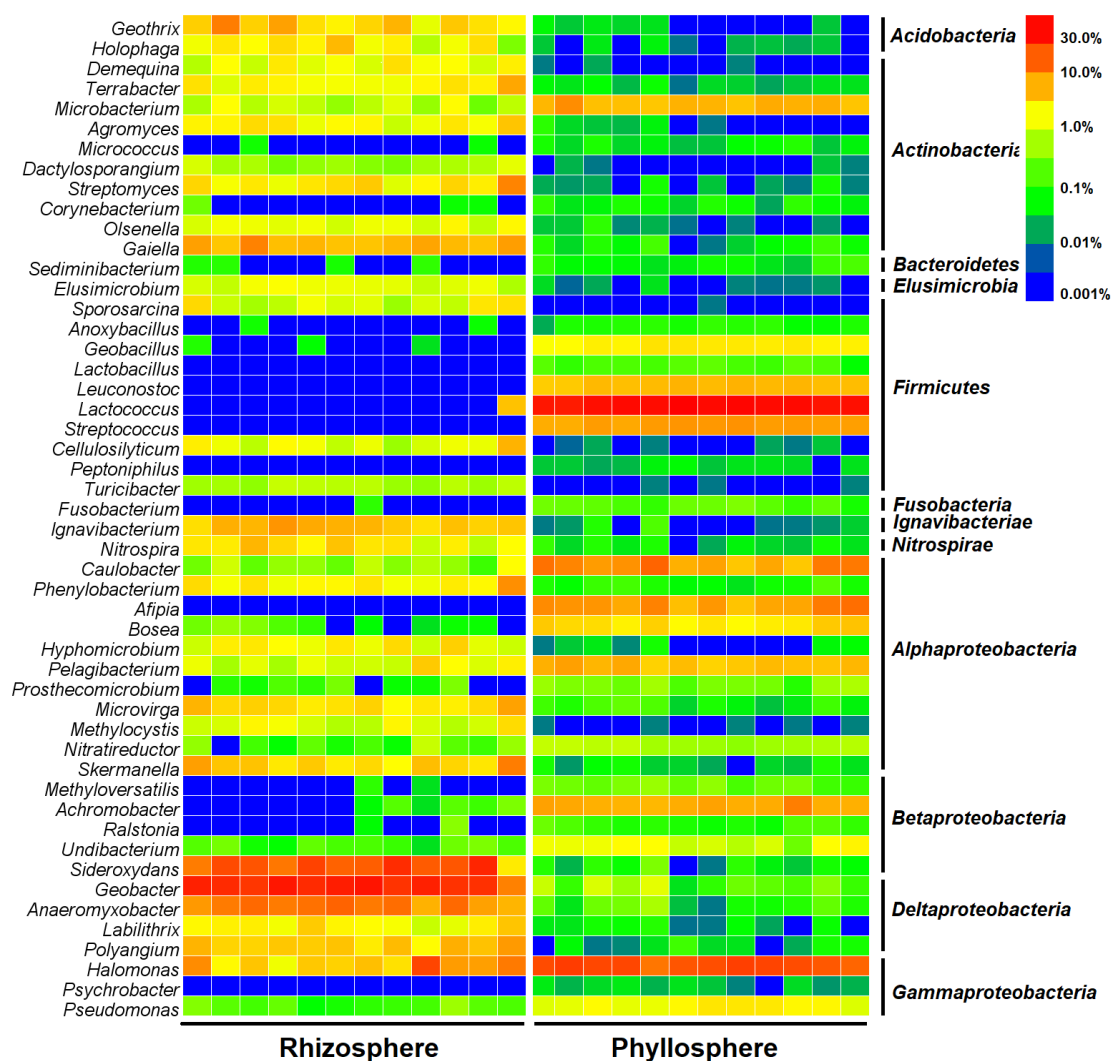

**Figure S3.** Heatmap show the top 50 most different and abundant genera in different epiphytic compartments. The color bar on the right shows the values of the relative abundance (%) for each genus.

**Table S1.** List of the physicochemical properties of bulk sediments in this study ( $n = 5$ ). T, temperature; TN, total nitrogen;  $\text{NO}_3^-$ -N, nitrate nitrogen;  $\text{NO}_2^-$ -N, nitrite nitrogen; TP, total phosphorus.

|           | T(°C) | pH              | TN<br>(g/kg)    | $\text{NO}_3^-$ -N<br>(mg/kg) | $\text{NO}_2^-$ -N<br>(mg/kg) | TP<br>(g/kg)    | Sediment<br>Type |
|-----------|-------|-----------------|-----------------|-------------------------------|-------------------------------|-----------------|------------------|
| Bulk soil | 32    | $5.67 \pm 0.23$ | $0.43 \pm 0.21$ | $0.54 \pm 0.08$               | $0.18 \pm 0.05$               | $0.17 \pm 0.04$ | Silty loam       |

**Table S2.** Relative abundance of dominant bacterial phyla/subphyla (relative abundance >1.0 %) in different epiphytic compartments (mean  $\pm$  SE). Significant differences among different groups (n = 12 for each group) was rendered in Figure 3 according to two-tailed independent-sample *t*-test. Phyla/ subphyla with relative abundance < 1.0% were defined as Minor. RAT, rhizosphere abundant taxa; PAT, phyllosphere abundant taxa; RRT, rhizosphere rare taxa; PRT, phyllosphere rare taxa.

| Taxon                        | All               |                  | Abundant         |                  | Rare             |                  |
|------------------------------|-------------------|------------------|------------------|------------------|------------------|------------------|
|                              | Rhizosphere       | Phyllosphere     | RAT              | PAT              | RRT              | PRT              |
| <i>Acidobacteria</i>         | 3.24 $\pm$ 0.84   | 0.30 $\pm$ 0.20  | 4.27 $\pm$ 0.29  | 0.00 $\pm$ 0.00  | 5.00 $\pm$ 0.59  | 2.57 $\pm$ 1.03  |
| <i>Actinobacteria</i>        | 12.14 $\pm$ 2.70  | 6.65 $\pm$ 1.66  | 13.04 $\pm$ 1.46 | 14.23 $\pm$ 0.53 | 10.32 $\pm$ 1.91 | 14.45 $\pm$ 1.92 |
| <i>Bacteroidetes</i>         | 5.33 $\pm$ 1.87   | 1.50 $\pm$ 0.79  | 6.93 $\pm$ 0.68  | 4.23 $\pm$ 0.98  | 6.67 $\pm$ 1.68  | 7.36 $\pm$ 1.42  |
| <i>Chloroflexi</i>           | 1.11 $\pm$ 0.26   | 0.09 $\pm$ 0.07  | 1.12 $\pm$ 0.13  | 0.00 $\pm$ 0.00  | 0.00 $\pm$ 0.00  | 0.00 $\pm$ 0.00  |
| <i>Firmicutes</i>            | 13.75 $\pm$ 14.21 | 41.33 $\pm$ 7.22 | 9.07 $\pm$ 1.76  | 27.65 $\pm$ 1.72 | 10.32 $\pm$ 4.81 | 17.57 $\pm$ 5.89 |
| <i>Alphaproteobacteria</i>   | 5.70 $\pm$ 1.12   | 22.64 $\pm$ 4.90 | 6.16 $\pm$ 0.22  | 25.30 $\pm$ 1.34 | 8.41 $\pm$ 0.66  | 15.40 $\pm$ 2.05 |
| <i>Betaproteobacteria</i>    | 11.21 $\pm$ 4.48  | 7.34 $\pm$ 1.13  | 9.36 $\pm$ 1.12  | 10.98 $\pm$ 0.88 | 6.91 $\pm$ 1.08  | 8.95 $\pm$ 1.13  |
| <i>Deltaproteobacteria</i>   | 12.55 $\pm$ 3.25  | 1.83 $\pm$ 0.95  | 14.33 $\pm$ 1.08 | 2.99 $\pm$ 0.94  | 10.16 $\pm$ 1.40 | 7.39 $\pm$ 2.17  |
| <i>Gammaproteobacteria</i>   | 3.33 $\pm$ 1.24   | 14.39 $\pm$ 3.49 | 2.85 $\pm$ 0.32  | 9.26 $\pm$ 0.78  | 2.85 $\pm$ 0.72  | 7.58 $\pm$ 1.92  |
| <i>Verrucomicrobia</i>       | 3.27 $\pm$ 1.13   | 0.25 $\pm$ 0.18  | 0.00 $\pm$ 0.00  | 0.00 $\pm$ 0.00  | 3.62 $\pm$ 0.75  | 1.83 $\pm$ 0.84  |
| <i>Bacteria_unclassified</i> | 23.16 $\pm$ 4.60  | 1.99 $\pm$ 1.08  | 23.64 $\pm$ 0.51 | 2.08 $\pm$ 0.43  | 27.84 $\pm$ 2.28 | 12.85 $\pm$ 3.74 |
| <i>Minor</i>                 | 5.21 $\pm$ 1.20   | 1.67 $\pm$ 0.97  | 9.23 $\pm$ 0.25  | 3.27 $\pm$ 0.39  | 7.91 $\pm$ 0.86  | 4.04 $\pm$ 1.14  |

**Table S3: Unweighted UniFrac dissimilarity of bacterial communities among different groups.**  $P < 0.001$  indicates that the bacterial communities were significantly different among different groups as detected by analysis of ANOSIM and PERMANOVA using the unweighted UniFrac distance.

| Distance              | Groups      |              | ANOSIM |       | PERMANOVA |                |       |
|-----------------------|-------------|--------------|--------|-------|-----------|----------------|-------|
|                       | group1      | group2       | R      | P     | F.Model   | R <sup>2</sup> | P     |
| unweighted<br>UniFrac | Rhizosphere | Phyllosphere | 0.9746 | 0.001 | 14.907    | 0.4039         | 0.001 |
|                       | RAT         | PAT          | 1      | 0.001 | 293.02    | 0.93016        | 0.001 |
|                       | RRT         | RRT          | 0.9437 | 0.001 | 10.701    | 0.32723        | 0.001 |
